# Supplementary material for: Seroprevalence of SARS-CoV-2 Antibodies and Factors Associated with Seropositivity at the University of Salamanca: The DIANCUSAL Study
Source: MDPI journal article supplement (doi:10.3390/jcm10153214), 2021-07-21
Supplement: s1 [file s1]

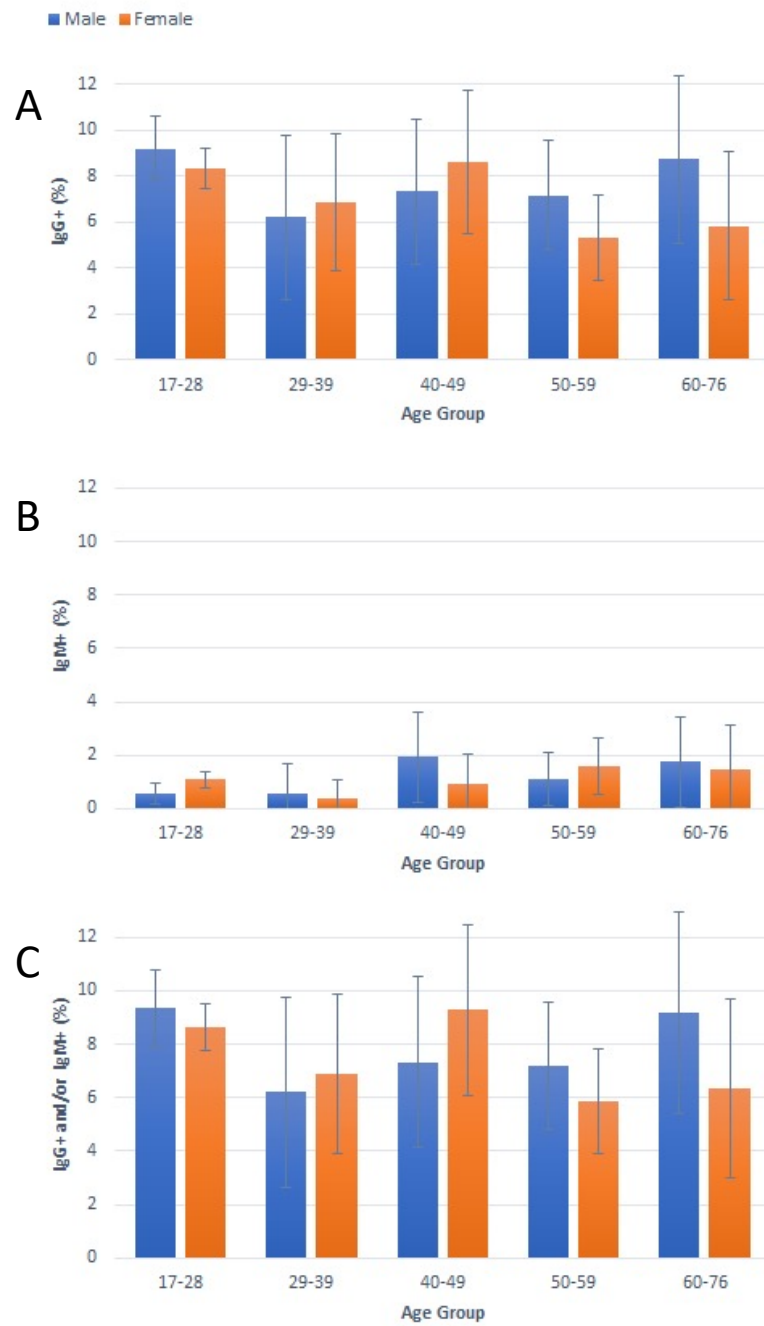

**Supplementary figure 2.** Seroprevalence by sex and age group: A) IgG antibodies, B) IgM antibodies and C) IgG and/or IgM antibodies
