# Supplementary material for: Seroprevalence of SARS-CoV-2 Antibodies and Factors Associated with Seropositivity at the University of Salamanca: The DIANCUSAL Study
Source: MDPI journal article supplement (doi:10.3390/jcm10153214), 2021-07-21
Supplement: s1 [file s1]

## Supplementary Figure 1

### QUESTIONNAIRE

#### Welcome to the DIANCUSAL clinical-epidemiological questionnaire

##### Weight and height data

Height (in cm.) \*

Weight (in kg.) \*

##### 1. Information about your home during the 20/21 academic year

Type of residence \*

Apartment / University Residence

If you live in an apartment, square meters of your home

If you live in a residence, Name of the university residence

Place of your habitual residence \*

Postal Code

Place of confinement \*

Cod. Confinement postcard

Number of habitual partners \*

Number of partners during confinement \*

Pets

YES / NO

Number

Species

##### 2. Clinical data

Toxic Habits

No / Smoker / Alcohol / Other drugs

Medical antecedents

Blood group

A / B / AB / O / No I know

Diseases

[write another disease] / Arterial Hypertension (HBP) / Diabetes Mellitus (DM) / Cardiovascular Risk Asthma / Chronic Obstructive Pulmonary Disease / Immunosuppression / Cardiovascular Pathology / Chronic kidney failure

Number of chronic medications

Types of medications

What protective measures have you used

None / Social withdrawal / Gloves / Gel / Handwashing Mask

### 3. COVID Diagnosis Have

you been diagnosed with COVID?

YES / NO

If the previous answer is affirmative, have you required hospitalization?

YES / NO

Date of admission

Place of hospitalization

Date of discharge

Briefly explain the reasons for admission

Clinical Evolution

### 4. If you have not been diagnosed with COVID, have you had any of these symptoms?

Do you think you may have had COVID?

YES / NO / Don't know / can

Fever

YES / NO / Don't know / can

Cough

YES / NO / Don't know / can't know / can

Sore throatSevere

YES / NO / Don't know / can

Chills

YES / NO / Do

Tiredness

YES / NO / Don't know / can

Feeling short of breath

YES / NO / Don't know / can

Headache

YES / NO / Don't know / can

Nausea

YES / NO / Don't know / can

Vomiting and / or diarrhea

YES / NO / No know / may

Sudden loss of sense of smell or taste

YES / NO / Don't know / may

### 5. COVID-19 diagnosis of a COVID-19: any

Has cohabitant been diagnosed with COVID?

YES / NO / Don't know / can

how many?

Age / Ages

Degree of familiarity

Have they required hospitalization?

YES / No / Don't know

### 6. Even though no COVID-19 has been diagnosed with COVID, do you know if they have had any of these symptoms?

**Do you think that a partner may have had COVID even though it has not been confirmed?**

YES / NO / Don't know / can

**Fever**

YES / NO / Don't know / can

**Cough**

YES / NO / Don't know / cann't know / can

**Sore throatSevere**

YES / NO / Don't know / can

**Chills**

YES / NO / Do

**Tiredness**

YES / NO / Don't know / can

**Feeling short of breath**

YES / NO / Don't know / can

**Headache**

YES / NO / Don't know / can

**Nausea**

YES / NO / Don't know / can

**Vomiting and / or diarrhea**

YES / NO / No know / can

**sudden loss of sense of taste or smell**

YES / NO / Do not know / can
