# Supplementary material for: Seroprevalence of SARS-CoV-2 Antibodies and Factors Associated with Seropositivity at the University of Salamanca: The DIANCUSAL Study
Source: MDPI journal article supplement (doi:10.3390/jcm10153214), 2021-07-21
Supplement: s1 [file s1]

**Supplementary table 1.** Seroprevalence of IgG & IgM antibodies according to blood types and Body Mass Index (BMI)

| Blood type &<br>Body mass index | N=8197 (%)   | IgG+       |               | IgM+    |            |                     | IgG+ and/or IgM+ |            |                     |         |
|---------------------------------|--------------|------------|---------------|---------|------------|---------------------|------------------|------------|---------------------|---------|
|                                 |              | N=n (%)    | p-value       | N=n (%) | p-value    |                     | N=n (%)          | p-value    |                     |         |
| Blood type                      | N=5210 (%)   |            |               |         |            |                     |                  |            |                     |         |
| O                               | 2102 (40.3%) | 159 (7.6%) | 0.147         |         | 23 (1.1%)  | 0.752               |                  | 167 (7.9%) | 0.110               |         |
| A                               | 2463 (47.3%) | 221 (9.0%) |               |         | 33 (1.3%)  |                     |                  | 227 (9.2%) |                     |         |
| B                               | 454 (8.7%)   | 30 (6.6%)  |               |         | 4 (0.9%)   |                     |                  | 30 (6.6%)  |                     |         |
| AB                              | 191 (3.7%)   | 19 (9.9%)  |               |         | 3 (1.6%)   |                     |                  | 21 (11.0%) |                     |         |
| Body Mass Index (BMI)           | N=8183 (%)   | N=n (%)    | OR 95% CI     | p-value | N=n (%)    | OR 95% CI           | p-value          | N=n (%)    | OR 95% CI           | p-value |
| <18.5                           | 560 (6.8%)   | 41 (7.3%)  | 1.009         | 0.415   | 4 (0.7%)   | 1.013 [0.960,1.069] | 0.637            | 43 (7.7%)  | 1.006 [0.986,1.027] | 0.541   |
| 18.5-24.9                       | 5486 (67.0%) | 443 (8.1%) | [0.988,1.029] |         | 54 (1.0%)  |                     |                  | 459 (8.4%) |                     |         |
| 25-29.9                         | 1665 (20.3%) | 133 (8.0%) | 25 (1.5%)     |         | 137 (8.2%) |                     |                  |            |                     |         |
| 30-34.9                         | 385 (4.7%)   | 31 (8.1%)  | 2 (0.5%)      |         | 31 (8.1%)  |                     |                  |            |                     |         |
| >35                             | 87 (1.1%)    | 6 (6.9%)   | 0 (0.0%)      |         | 6 (6.9%)   |                     |                  |            |                     |         |
