# Supplementary material for: Seroprevalence of SARS-CoV-2 Antibodies and Factors Associated with Seropositivity at the University of Salamanca: The DIANCUSAL Study
Source: MDPI journal article supplement (doi:10.3390/jcm10153214), 2021-07-21
Supplement: s1 [file s1]

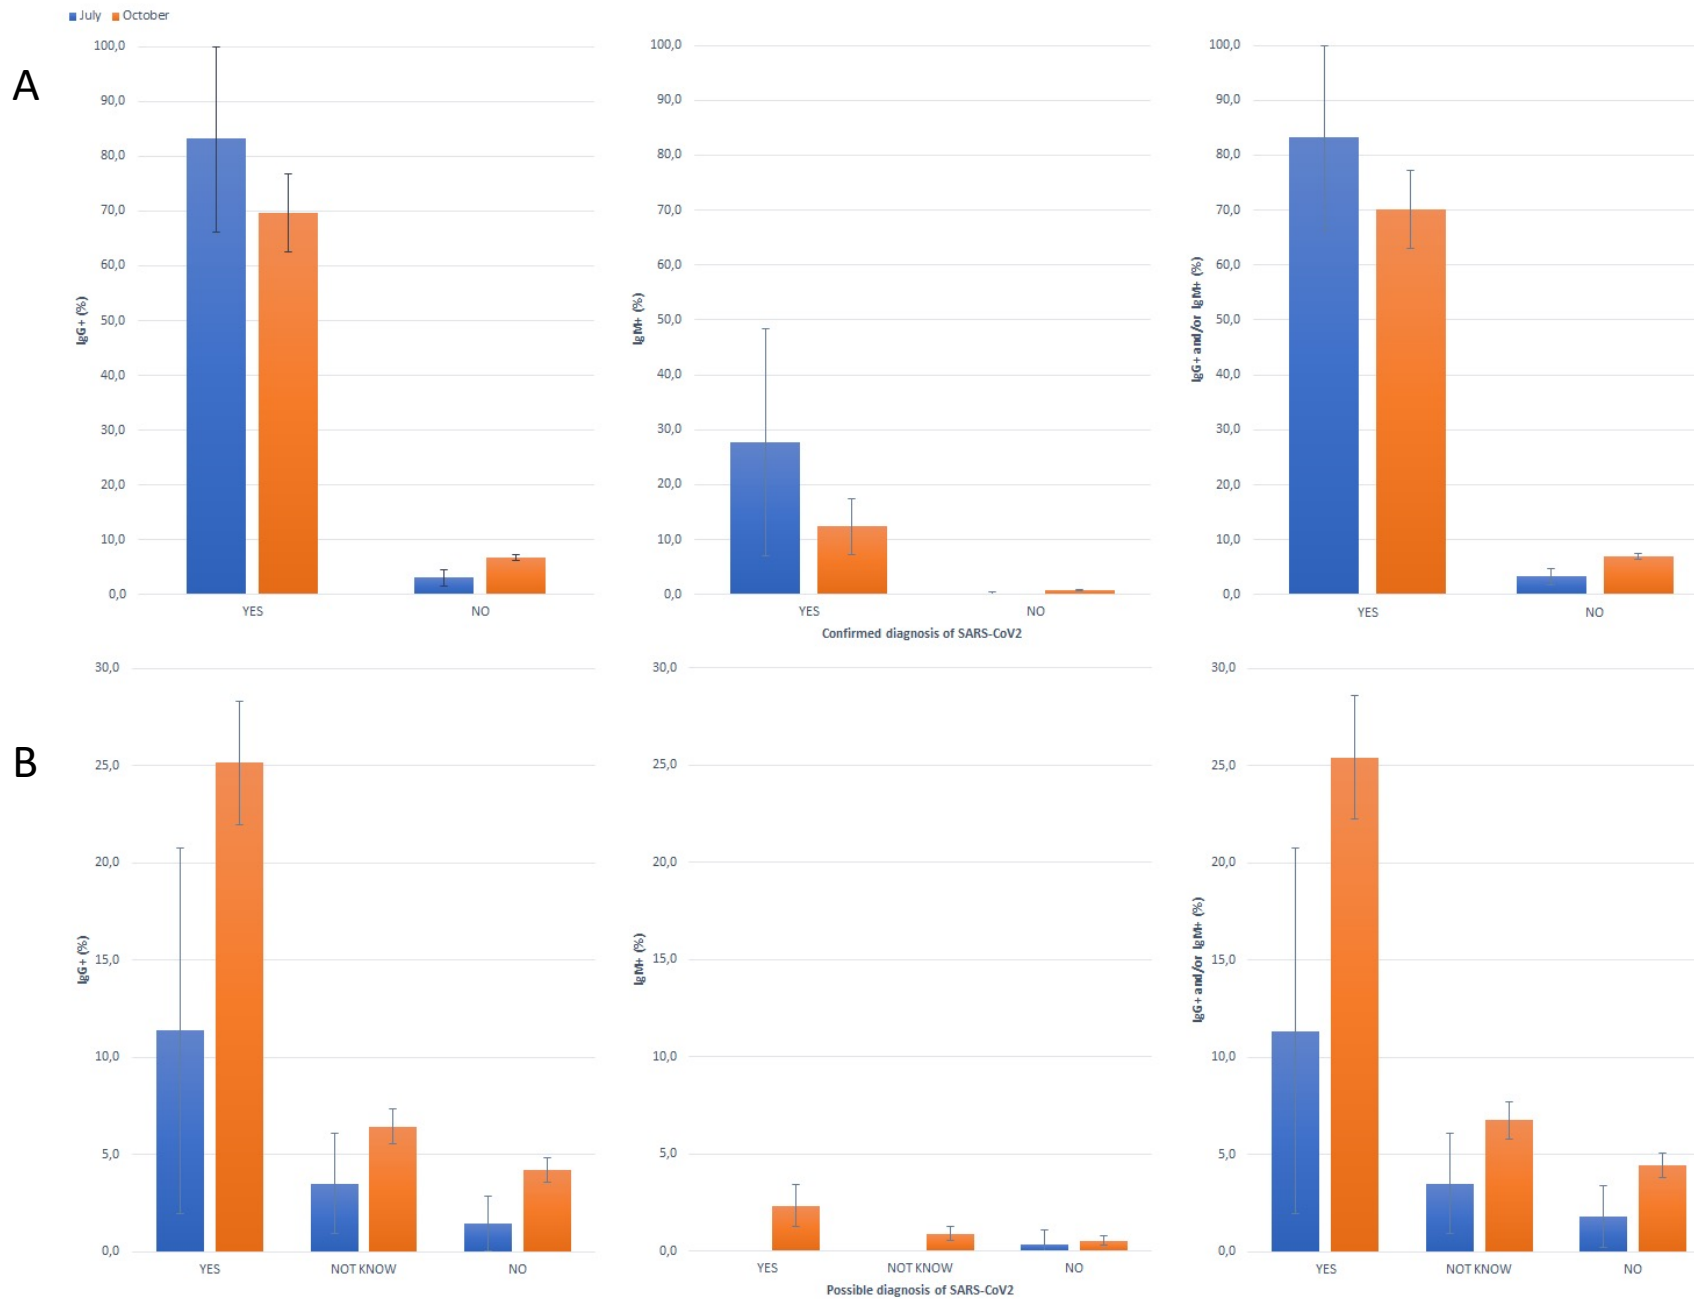

**Supplementary figure 3.** Seroprevalence according to the time of the serology A) Confirmed diagnosis of SARS-CoV2, B) Possible diagnosis of SARS-CoV2
